# Supplementary material for: A flexible count data model to fit the wide diversity of expression profiles arising from extensively replicated RNA-seq experiments
Source: Springer Nature journal article supplement (doi:10.1186/1471-2105-14-254), 2013-08-21

Fold-change 1.5

Fold-change 2.0

Fold-change 4.0

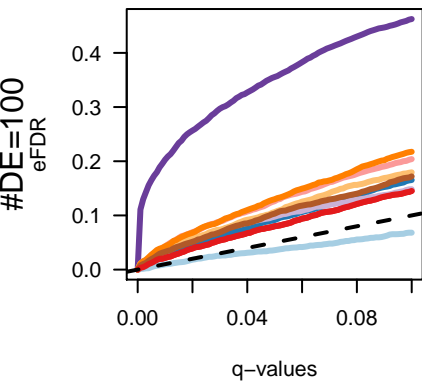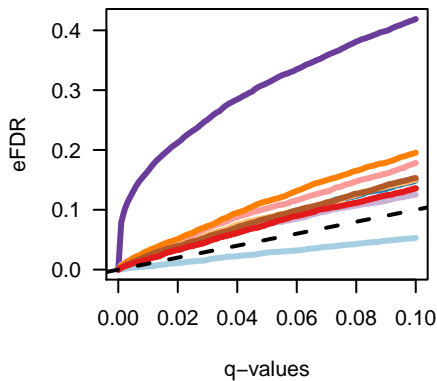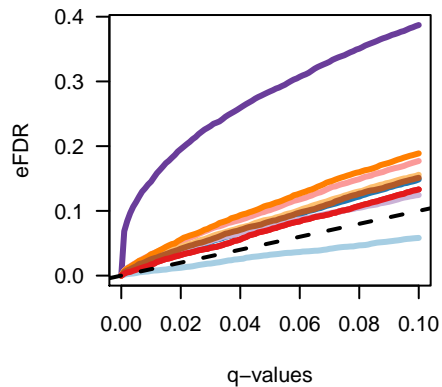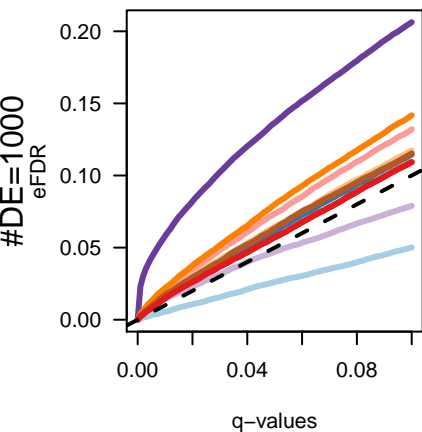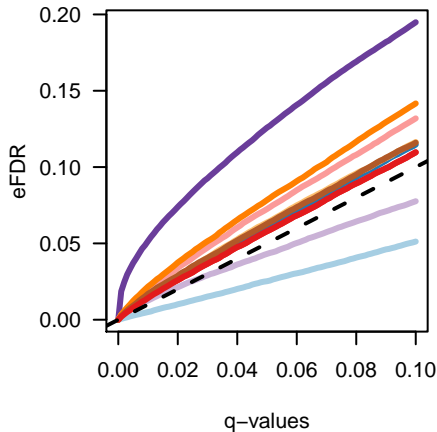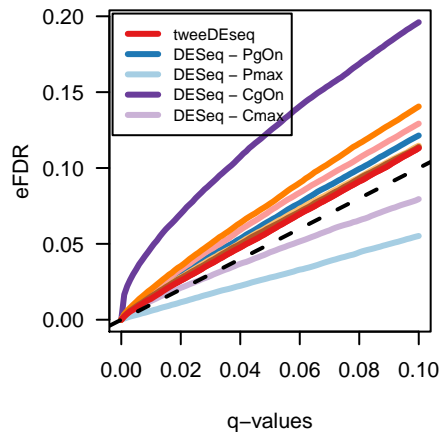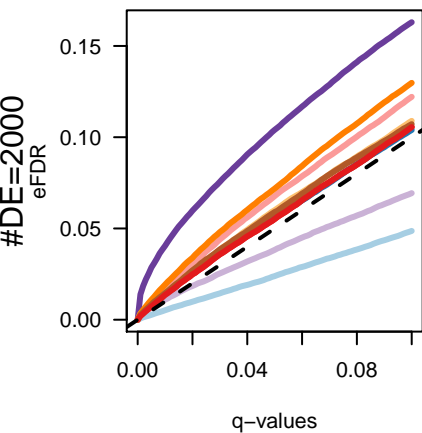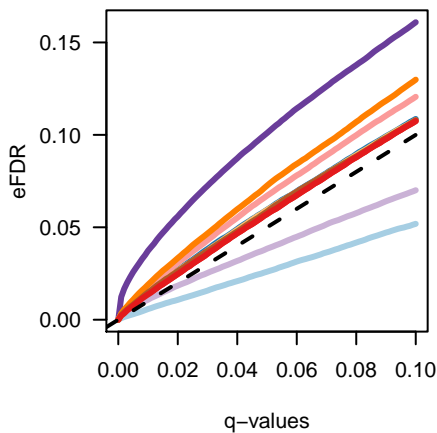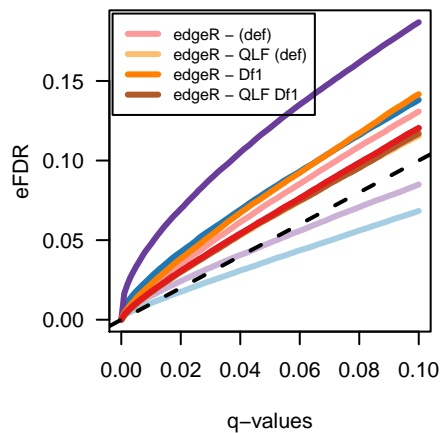

Supplement: 12859_2013_6060_MOESM10_ESM.pdf [file 12859_2013_6060_MOESM10_ESM.pdf]
